# Supplementary material for: Evaluation of a Supervised Adapted Physical Activity Program Associated or Not with Oral Supplementation with Arginine and Leucine in Subjects with Obesity and Metabolic Syndrome: A Randomized Controlled Trial
Source: MDPI journal article supplement (doi:10.3390/nu14183708), 2022-09-08
Supplement: s1 [file s1]

**Evaluation of a supervised adapted physical activity program associated or not to oral supplementation with arginine and leucine in obese subjects with metabolic syndrome: a randomized controlled trial.**

**Vanessa Folope et al.**

Supplemental materials

**Supplemental Table S1: Biological data at baseline**

|                                                                 | <b>Control</b>      | <b>ALs</b>           | <b>APA</b>           | <b>Als + APA</b>    | <b>P values</b> |
|-----------------------------------------------------------------|---------------------|----------------------|----------------------|---------------------|-----------------|
|                                                                 | <b>(n=19)</b>       | <b>(n=20)</b>        | <b>(n=20)</b>        | <b>(n=20)</b>       |                 |
| <b>REE (kcal/day)</b>                                           | 1996 [1924 ; 2207]  | 1954.5 [1743 ; 2124] | 1765.5 [1637 ; 2123] | 1980 [1778 ; 2134]  | 0.2491          |
| <b>Total cholesterol (mmol/L)</b>                               | 5.3 [4.9 ; 6.8]     | 5.8 [5.2 ; 6.2]      | 5.6 [5 ; 6.4]        | 5.1 [4.4 ; 5.6]     | 0.2409          |
| <b>HDL cholesterol (mmol/L)</b>                                 | 1.1 [0.9 ; 1.3]     | 1.1 [0.9 ; 1.2]      | 1.1 [0.9 ; 1.5]      | 1 [1 ; 1.1]         | 0.5624          |
| <b>LDL cholesterol (mmol/L)</b>                                 | 3.3 [2.7 ; 4.6]     | 4.1 [3.1 ; 4.5]      | 3.7 [2.7 ; 4.2]      | 3.3 [2.6 ; 3.6]     | 0.3004          |
| <b>Triglycerides (mmol/L)</b>                                   | 1.9 [1.3 ; 2.4]     | 1.7 [1.4 ; 2.4]      | 1.9 [1.5 ; 2.3]      | 1.5 [1.1 ; 2.1]     | 0.3745          |
| <b>ASAT (UI/L)</b>                                              | 25 [20 ; 32]        | 27 [21.5 ; 34.5]     | 24.5 [21.5 ; 27]     | 22 [20.5 ; 25]      | 0.3379          |
| <b>ALAT (UI/L)</b>                                              | 37 [25 ; 65]        | 49 [26 ; 59.5]       | 33 [27 ; 49]         | 33.5 [27.5 ; 40.5]  | 0.6148          |
| <b>ALP (UI/L)</b>                                               | 69 [58 ; 76]        | 58.5 [47.5 ; 68]     | 74 [63.5 ; 82.5]     | 66 [53 ; 78]        | 0.0971          |
| <b>γGT (UI/L)</b>                                               | 33 [24 ; 78]        | 39 [24 ; 50.5]       | 29 [20.5 ; 49.5]     | 29.5 [24.5 ; 60.5]  | 0.6706          |
| <b>Fasting glycaemia (pmol/L)</b>                               | 5.6 [5.1 ; 6.3]     | 5.1 [4.8 ; 6]        | 5.5 [5.1 ; 6.3]      | 5.5 [4.9 ; 5.9]     | 0.4529          |
| <b>Fasting Insulin (mUI/L)</b>                                  | 155 [134 ; 219]     | 139.5 [97.5 ; 175.5] | 111 [80 ; 201]       | 148.5 [107 ; 180]   | 0.2178          |
| <b>HOMA-IR</b>                                                  | 38.3 [33.2 ; 52.4]  | 30.6 [17 ; 46.2]     | 23.6 [19 ; 57.2]     | 34.7 [28.7 ; 43.3]  | 0.1805          |
| <b>Leptin (ng/mL)</b>                                           | 73.3 [36.3 ; 136.1] | 69.9 [42.6 ; 157.2]  | 84.1 [62.7 ; 132.9]  | 88.1 [48.6 ; 125.2] | 0.9677          |
| <b>Adiponectin (μg/mL)</b>                                      | 6.2 [4.5 ; 8.7]     | 5.4 [4.1 ; 7.4]      | 6.3 [4.9 ; 8.3]      | 5.1 [4.5 ; 8.3]     | 0.6804          |
| <b>IL-6 (pg/mL)</b>                                             | 1.4 [1.3 ; 3.2]     | 1.4 [1.1 ; 2.5]      | 1.6 [1.2 ; 2.5]      | 1.5 [0.9 ; 1.9]     | 0.9589          |
| <b>TNFα (pg/mL)</b>                                             | 1.5 [1.4 ; 1.7]     | 1.7 [1.2 ; 1.9]      | 1.7 [1.4 ; 2.1]      | 1.8 [1.4 ; 2.1]     | 0.5466          |
| <b>CRP (mg/L)</b>                                               | 5.1 [2.1 ; 5.9]     | 3.5 [2.4 ; 5.8]      | 5.3 [2.8 ; 6.5]      | 3.4 [2.8 ; 5.3]     | 0.6361          |
| <b>Pmax (W)</b>                                                 | 140 [120 ; 180]     | 155 [130 ; 195]      | 140 [110 ; 180]      | 145 [120 ; 155]     | 0.6036          |
| <b>Ppeak (Pmax/poids) (W.kg<sup>-1</sup>)</b>                   | 1.2 [1 ; 1.8]       | 1.6 [1.3 ; 1.8]      | 1.5 [1.1 ; 1.7]      | 1.3 [1.2 ; 1.6]     | 0.3412          |
| <b>VO<sub>2</sub> max (L.min<sup>-1</sup>)</b>                  | 2.1 [1.9 ; 2.6]     | 2.2 [2 ; 2.6]        | 2.2 [1.6 ; 2.6]      | 1.9 [1.6 ; 2.4]     | 0.3245          |
| <b>VO<sub>2</sub> max (mL.kg<sup>-1</sup>.min<sup>-1</sup>)</b> | 17.5 [16.4 ; 23.7]  | 21.4 [18.5 ; 24.1]   | 21.4 [17.4 ; 24.8]   | 20.4 [16.9 ; 21.2]  | 0.4278          |
| <b>VCO<sub>2</sub>/VO<sub>2</sub> max</b>                       | 1.3 [1.3 ; 1.4]     | 1.3 [1.3 ; 1.4]      | 1.3 [1.3 ; 1.3]      | 1.3 [1.3 ; 1.4]     | 0.1773          |

*(Supplemental Table S1 continued)*

|                                                                  |                   |                       |                     |                     |        |
|------------------------------------------------------------------|-------------------|-----------------------|---------------------|---------------------|--------|
| <b>Heart rate max (bpm)</b>                                      | 170 [161 ; 177]   | 172 [163 ; 179]       | 163.5 [147 ; 176]   | 157 [147 ; 169.5]   | 0.0851 |
| <b>P(VT) (W)</b>                                                 | 80 [70 ; 105]     | 90 [75 ; 120]         | 80 [70 ; 115]       | 80 [60 ; 100]       | 0.5218 |
| <b>VO<sub>2</sub> (VT) (mL.kg<sup>-1</sup>.min<sup>-1</sup>)</b> | 11.5 [9.3 ; 13.8] | 13.6 [10.5 ; 15.6]    | 12 [9.8 ; 15.6]     | 12.1 [10.6 ; 12.8]  | 0.3729 |
| <b>Heart rate (VT) (bpm)</b>                                     | 128 [120 ; 137]   | 131 [122 ; 138 ]      | 120 [110 ; 140 ]    | 125 [115 ; 134]     | 0.3686 |
| <b>Slow VC (L)</b>                                               | 3.8 [3.4 ; 4.4]   | 4 [3.7 ; 4.9]         | 3.8 [3.4 ; 4.3]     | 3.9 [3.4 ; 4.9]     | 0.5657 |
| <b>Forced VC (L)</b>                                             | 3.5 [3.1 ; 4.2]   | 4 [3.4 ; 4.6]         | 3.6 [3.1 ; 4.2]     | 3.5 [3.3 ; 4.4]     | 0.5520 |
| <b>Inspiratory VC (L)</b>                                        | 3 [2.8 ; 3.4]     | 3.4 [2.9 ; 4.2]       | 3.4 [2.7 ; 3.7]     | 3.2 [2.7 ; 4]       | 0.3622 |
| <b>Expiratory Reserve Volume (L)</b>                             | 0.8 [0.5 ; 1.1]   | 0.6 [0.4 ; 0.9]       | 0.5 [0.2 ; 0.8]     | 0.6 [0.5 ; 0.9]     | 0.1931 |
| <b>Forced expiratory volume (L)</b>                              | 2.8 [2.5 ; 3.4]   | 3.2 [2.7 ; 3.5]       | 2.9 [2.5 ; 3.3]     | 2.7 [2.5 ; 3.3]     | 0.6392 |
| <b>Dyspnoea (n/% of patients)</b>                                | 15 (88.2)         | 19 (95)               | 17 (85)             | 17 (85)             | 0.7889 |
| <b>Fatigue (n/% of patients)</b>                                 | 3 (17.6)          | 4 (20)                | 3 (15)              | 5 (25)              | 0.9239 |
| <b>SF36 (physical function)</b>                                  | 213.5 [188 ; 276] | 291 [249 ; 321]       | 262 [163 ; 318]     | 275 [208 ; 331.5]   | 0.2028 |
| <b>SF36 (Mental Health)</b>                                      | 211 [161.3 ; 285] | 273.5 [237.3 ; 330.8] | 270 [156.9 ; 308.3] | 247 [132.5 ; 298.5] | 0.2892 |

Data are expressed as median (quartiles 1 and 3). Continued data have been compared with Kruskal-Wallis and discontinued data with Khi2 or exact Fisher tests. BMI, body mass index; REE, resting energy expenditure; P, power; VT, ventilator threshold; VC, vital capacity.

**Supplemental Table S2: Other changes observed after 6 months of treatment: delta m0-m6.**

|                                 | <b>Control<br/>(n=13)</b> | <b>ALs<br/>(n=18)</b> | <b>APA<br/>(n=12)</b> | <b>Als + APA<br/>(n=14)</b> | <b>P values</b> |
|---------------------------------|---------------------------|-----------------------|-----------------------|-----------------------------|-----------------|
| <b>REE (kcal/day)</b>           | -49 [-112 ; 6]            | -93.5 [-188 ; 21]     | -43 [-62 ; 5]         | -49 [-163 ; 54]             | 0.8754          |
| <b>SF36 (physical function)</b> | 42 [-83 ; 112]            | 27 [-13 ; 51]         | 23 [1 ; 154]          | 78 [29 ; 118]               | 0.1456          |
| <b>SF36 (Mental Health)</b>     | 3.5 [-89.3 ; 41.3]        | 17 [-6.5 ; 36.5]      | 75.8 [5 ; 107]        | 45.5 [19 ; 86.5]            | 0.0819          |

Data are expressed as median (quartiles 1 and 3). Continued data have been compared with Kruskal-Wallis and Dunn post-tests. BMI, body mass index; REE, resting energy expenditure; P, power; VT, ventilator threshold; VC, vital capacity.

**Supplemental Table S3: Other changes observed between 6-months and 9 months of follow-up: delta m6-m9**

|                            | Control<br>(n=13)                  | ALs<br>(n=18)                     | APA<br>(n=12)                   | Als + APA<br>(n=14)                | P values       |
|----------------------------|------------------------------------|-----------------------------------|---------------------------------|------------------------------------|----------------|
| REE (kcal/day)             | -42 [-98 ; 39]                     | 26 [-182 ; 208]                   | 30.5 [-7 ; 103]                 | 19 [-39 ; 57]                      | 0.4793         |
| Total cholesterol (mmol/L) | 0.2 [-0.05 ; 0.45]                 | -0.05 [-0.4 ; 0.1]                | 0.3 [-0.1 ; 0.8]                | 0 [-0.18 ; 0.3]                    | 0.2949         |
| HDL cholesterol (mmol/L)   | 0.05 [-0.07 ; 0.14]                | 0.03 [-0.08 ; 0.18]               | 0.02 [-0.04 ; 0.07]             | 0.06 [-0.07 ; 0.19]                | 0.9440         |
| LDL cholesterol (mmol/L)   | 0.32 [-0.06 ; 1.46] <sup>a,b</sup> | -0.24 [-0.46 ; 0.04] <sup>a</sup> | 0.6 [-0.13 ; 0.72] <sup>b</sup> | 0.08 [-0.44 ; 0.32] <sup>a,b</sup> | <b>0.0128*</b> |
| Triglycerides (mmol/L)     | -0.1 [-0.77 ; 0.23]                | 0.22 [-0.29 ; 1.09]               | -0.18 [-0.63 ; 0.38]            | -0.08 [-0.55 ; 0.15]               | 0.1316         |
| ASAT (UI/L)                | -0.5 [-2.5 ; 5]                    | 0 [-1 ; 4]                        | -1 [-7 ; 4]                     | 1 [-4 ; 2]                         | 0.9139         |
| ALAT (UI/L)                | -2 [-4.5 ; 4.5]                    | -2.5 [-10 ; 8]                    | -3 [-10 ; 3]                    | -1 [-2 ; 5]                        | 0.7071         |
| ALP (UI/L)                 | -0.5 [-2.5 ; 2.5]                  | -0.5 [-4 ; 4]                     | 1 [-8 ; 6]                      | 1 [-2 ; 4]                         | 0.9480         |
| γGT (UI/L)                 | -0.5 [-5.5 ; 2]                    | 1 [-3 ; 8]                        | 0.5 [-2 ; 3]                    | -1 [-7 ; 5]                        | 0.8531         |
| Fasting glycaemia (pmol/L) | 0.1 [-0.25 ; 0.55]                 | 0 [-0.2 ; 0.4]                    | 0.1 [0 ; 0.3]                   | 0.05 [-0.2 ; 0.3]                  | 0.8953         |
| Fasting Insulin (mUI/L)    | -0.5 [-40 ; 27.5]                  | 1 [-4 ; 49]                       | 0 [-22 ; 55]                    | -0.5 [-13 ; 33]                    | 0.6731         |
| HOMA-IR                    | 1.03 [-7.05 ; 7.64]                | 0.76 [-0.96 ; 10.76]              | 0.28 [-4.95 ; 11.36]            | 0.86 [-3.94 ; 8.21]                | 0.8013         |
| Leptin (ng/mL)             | 4.81 [-18.74 ; 22.84]              | 7.73 [-8.21 ; 17.32]              | 2.86 [-1.58 ; 20.17]            | 2.17 [-7.92 ; 17.7]                | 0.9246         |
| Adiponectin (μg/mL)        | 0.36 [-0.39 ; 1.39]                | 0.12 [-0.3 ; 0.8]                 | -1.02 [-1.72 ; 0.08]            | -0.42 [-0.56 ; 0.09]               | <b>0.0239*</b> |
| IL-6 (pg/mL)               | -0.04 [-0.77 ; 0.11]               | 0.11 [-0.32 ; 0.33]               | 0.27 [0 ; 1.47]                 | 0.48 [-0.21 ; 0.73]                | 0.1903         |
| TNFα (pg/mL)               | -0.4 [-0.6 ; 0.14]                 | 0 [-0.24 ; 0.42]                  | -0.04 [-0.17 ; 0.11]            | -0.41 [-0.57 ; 0.09]               | 0.2669         |
| CRP (mg/L)                 | 0.21 [-1.3 ; 1.05]                 | 0.28 [-0.19 ; 1.35]               | -0.1 [-0.29 ; 1.2]              | 0.29 [-0.46 ; 0.77]                | 0.8182         |
| SF36 (physical function)   | -15 [-35 ; 9]                      | 3 [-30 ; 43]                      | -9.5 [-46 ; 19.5]               | -7 [-18 ; 19]                      | 0.8454         |
| SF36 (Mental Health)       | 12.75 [-0.3 ; 23.7]                | -8.5 [-40.5 ; 18.5]               | 0.65 [-68.75 ; 16.25]           | 8.25 [-102.3 ; 30.5]               | 0.4049         |

Data are expressed as median (quartiles 1 and 3). Continued data have been compared with Kruskal-Wallis and Dunn post-tests. BMI, body mass index; REE, resting energy expenditure. Values without a common letter significantly differ, \*p<0.05.
